# Supplementary material
Source: publisher figshare collection journal article supplement (https://acs.figshare.com/ndownloader/files/3744520)
Supplement: Supplementary file 1 [file 3744520]

 
data_ad_87so2 
 
_audit_creation_method            SHELXL-97 
_chemical_name_systematic 
; 
 ? 
; 
_chemical_name_common             ? 
_chemical_melting_point           ? 
_chemical_formula_moiety          'C23 H20 O4 S'
_chemical_formula_sum 
 'C23 H20 O4 S' 
_chemical_formula_weight          392.45 
 
loop_ 
 _atom_type_symbol 
 _atom_type_description 
 _atom_type_scat_dispersion_real 
 _atom_type_scat_dispersion_imag 
 _atom_type_scat_source 
 'C'  'C'   0.0033   0.0016 
 'International Tables Vol C Tables 4.2.6.8 and 6.1.1.4' 
 'H'  'H'   0.0000   0.0000 
 'International Tables Vol C Tables 4.2.6.8 and 6.1.1.4' 
 'O'  'O'   0.0106   0.0060 
 'International Tables Vol C Tables 4.2.6.8 and 6.1.1.4' 
 'S'  'S'   0.1246   0.1234 
 'International Tables Vol C Tables 4.2.6.8 and 6.1.1.4' 
 
_symmetry_cell_setting            monoclinic 
_symmetry_space_group_name_H-M    P21/a 
 
loop_ 
 _symmetry_equiv_pos_as_xyz 
 'x, y, z' 
 '-x+1/2, y+1/2, -z' 
 '-x, -y, -z' 
 'x-1/2, -y-1/2, z' 
 
_cell_length_a                    5.614(2) 
_cell_length_b                    32.096(12) 
_cell_length_c                    11.011(2) 
_cell_angle_alpha                 90.00 
_cell_angle_beta                  101.47(3) 
_cell_angle_gamma                 90.00 
_cell_volume                      1944.6(12) 
_cell_formula_units_Z             4 
_cell_measurement_temperature     293(2) 
_cell_measurement_reflns_used     1882 
_cell_measurement_theta_min       3.1573
_cell_measurement_theta_max       28.6519
 
_exptl_crystal_description        block 
_exptl_crystal_colour             colorless 
_exptl_crystal_size_max           0.4
_exptl_crystal_size_mid           0.3
_exptl_crystal_size_min           0.2
_exptl_crystal_density_meas       ? 
_exptl_crystal_density_diffrn     1.340 
_exptl_crystal_density_method     'not measured' 
_exptl_crystal_F_000              824 
_exptl_absorpt_coefficient_mu     0.193 
_exptl_absorpt_correction_type    multi-scan
_exptl_absorpt_correction_T_min   0.46386
_exptl_absorpt_correction_T_max   1.00000
_exptl_absorpt_process_details    ? 
 
_exptl_special_details 
; 
 ? 
; 
 
_diffrn_ambient_temperature       293(2) 
_diffrn_radiation_wavelength      0.71073 
_diffrn_radiation_type            MoK\a 
_diffrn_radiation_source          'fine-focus sealed tube' 
_diffrn_radiation_monochromator   graphite 
_diffrn_measurement_device_type   ? 
_diffrn_measurement_method        ? 
_diffrn_detector_area_resol_mean  ? 
_diffrn_standards_number          ? 
_diffrn_standards_interval_count  ? 
_diffrn_standards_interval_time   ? 
_diffrn_standards_decay_%         ? 
_diffrn_reflns_number             6883 
_diffrn_reflns_av_R_equivalents   0.0551 
_diffrn_reflns_av_sigmaI/netI     0.0826 
_diffrn_reflns_limit_h_min        -6 
_diffrn_reflns_limit_h_max        6 
_diffrn_reflns_limit_k_min        -38 
_diffrn_reflns_limit_k_max        36 
_diffrn_reflns_limit_l_min        -8 
_diffrn_reflns_limit_l_max        13 
_diffrn_reflns_theta_min          3.16 
_diffrn_reflns_theta_max          25.00 
_reflns_number_total              3428 
_reflns_number_gt                 2453 
_reflns_threshold_expression      >2sigma(I) 
 
_computing_data_collection        ? 
_computing_cell_refinement        ? 
_computing_data_reduction         ? 
_computing_structure_solution     'SHELXS-97 (Sheldrick, 1990)' 
_computing_structure_refinement   'SHELXL-97 (Sheldrick, 1997)' 
_computing_molecular_graphics     ? 
_computing_publication_material   ? 
 
_refine_special_details 
; 
 Refinement of F^2^ against ALL reflections.  The weighted R-factor wR and 
 goodness of fit S are based on F^2^, conventional R-factors R are based 
 on F, with F set to zero for negative F^2^. The threshold expression of 
 F^2^ > 2sigma(F^2^) is used only for calculating R-factors(gt) etc. and is 
 not relevant to the choice of reflections for refinement.  R-factors based 
 on F^2^ are statistically about twice as large as those based on F, and R- 
 factors based on ALL data will be even larger. 
; 
 
_refine_ls_structure_factor_coef  Fsqd  
_refine_ls_matrix_type            full 
_refine_ls_weighting_scheme       calc  
_refine_ls_weighting_details 
 'calc w=1/[\s^2^(Fo^2^)+(0.0505P)^2^+1.5418P] where P=(Fo^2^+2Fc^2^)/3' 
_atom_sites_solution_primary      direct 
_atom_sites_solution_secondary    difmap 
_atom_sites_solution_hydrogens    geom 
_refine_ls_hydrogen_treatment     mixed 
_refine_ls_extinction_method      SHELXL 
_refine_ls_extinction_coef        0.0009(9) 
_refine_ls_extinction_expression 
 'Fc^*^=kFc[1+0.001xFc^2^\l^3^/sin(2\q)]^-1/4^' 
_refine_ls_number_reflns          3428 
_refine_ls_number_parameters      255 
_refine_ls_number_restraints      0 
_refine_ls_R_factor_all           0.0974 
_refine_ls_R_factor_gt            0.0671 
_refine_ls_wR_factor_ref          0.1654 
_refine_ls_wR_factor_gt           0.1422 
_refine_ls_goodness_of_fit_ref    1.050 
_refine_ls_restrained_S_all       1.050 
_refine_ls_shift/su_max           0.001 
_refine_ls_shift/su_mean          0.000 
 
loop_ 
 _atom_site_label 
 _atom_site_type_symbol 
 _atom_site_fract_x 
 _atom_site_fract_y 
 _atom_site_fract_z 
 _atom_site_U_iso_or_equiv 
 _atom_site_adp_type 
 _atom_site_occupancy 
 _atom_site_symmetry_multiplicity 
 _atom_site_calc_flag 
 _atom_site_refinement_flags 
 _atom_site_disorder_assembly 
 _atom_site_disorder_group 
S1 S 0.52294(17) 0.32468(3) 0.63497(9) 0.0370(3) Uani 1 1 d . . . 
O2 O 0.2953(4) 0.34244(9) 0.6479(3) 0.0539(8) Uani 1 1 d . . . 
O1 O 0.5221(5) 0.28566(8) 0.5703(2) 0.0517(8) Uani 1 1 d . . . 
O3 O 0.9385(5) 0.39965(9) 0.3999(3) 0.0579(8) Uani 1 1 d . . . 
O4 O 0.4343(6) 0.30572(8) 0.2792(3) 0.0588(8) Uani 1 1 d . . . 
C13 C 0.6862(6) 0.36228(10) 0.5591(3) 0.0313(8) Uani 1 1 d . . . 
H13 H 0.8571 0.3537 0.5737 0.038 Uiso 1 1 calc R . . 
C1 C 0.7049(6) 0.31838(10) 0.7830(3) 0.0336(8) Uani 1 1 d . . . 
C16 C 0.6189(6) 0.40892(10) 0.2294(3) 0.0317(8) Uani 1 1 d . . . 
C15 C 0.7303(7) 0.39202(11) 0.3530(3) 0.0353(8) Uani 1 1 d . . . 
C14 C 0.5855(6) 0.36071(10) 0.4174(3) 0.0310(8) Uani 1 1 d . . . 
H14 H 0.4143 0.3691 0.4012 0.037 Uiso 1 1 calc R . . 
C7 C 0.6756(6) 0.40559(10) 0.6142(3) 0.0313(8) Uani 1 1 d . . . 
C21 C 0.3883(7) 0.39842(11) 0.1644(3) 0.0405(9) Uani 1 1 d . . . 
H21 H 0.2888 0.3814 0.2013 0.049 Uiso 1 1 calc R . . 
C2 C 0.9176(7) 0.29547(12) 0.7969(4) 0.0474(10) Uani 1 1 d . . . 
H2 H 0.9667 0.2843 0.7280 0.057 Uiso 1 1 calc R . . 
C22 C 0.6080(7) 0.31802(11) 0.3532(4) 0.0413(9) Uani 1 1 d . . . 
C12 C 0.4709(7) 0.43021(11) 0.5863(4) 0.0422(9) Uani 1 1 d . . . 
H12 H 0.3326 0.4199 0.5342 0.051 Uiso 1 1 calc R . . 
C8 C 0.8769(7) 0.42124(12) 0.6943(4) 0.0428(9) Uani 1 1 d . . . 
H8 H 1.0162 0.4050 0.7157 0.051 Uiso 1 1 calc R . . 
C19 C 0.4523(8) 0.43834(13) -0.0103(4) 0.0560(12) Uani 1 1 d . . . 
H19 H 0.3979 0.4475 -0.0912 0.067 Uiso 1 1 calc R . . 
C17 C 0.7614(7) 0.43521(11) 0.1727(4) 0.0450(10) Uani 1 1 d . . . 
H17 H 0.9150 0.4430 0.2153 0.054 Uiso 1 1 calc R . . 
C10 C 0.6683(8) 0.48522(12) 0.7134(4) 0.0524(11) Uani 1 1 d . . . 
H10 H 0.6663 0.5118 0.7468 0.063 Uiso 1 1 calc R . . 
C11 C 0.4673(7) 0.47020(12) 0.6345(4) 0.0494(10) Uani 1 1 d . . . 
H11 H 0.3290 0.4867 0.6131 0.059 Uiso 1 1 calc R . . 
C3 C 1.0556(8) 0.28942(13) 0.9134(4) 0.0563(12) Uani 1 1 d . . . 
H3 H 1.1994 0.2743 0.9232 0.068 Uiso 1 1 calc R . . 
C4 C 0.9821(9) 0.30573(14) 1.0163(4) 0.0614(13) Uani 1 1 d . . . 
H4 H 1.0757 0.3016 1.0951 0.074 Uiso 1 1 calc R . . 
C9 C 0.8722(8) 0.46101(12) 0.7430(4) 0.0536(11) Uani 1 1 d . . . 
H9 H 1.0090 0.4713 0.7963 0.064 Uiso 1 1 calc R . . 
C23 C 0.8461(8) 0.29625(13) 0.3768(4) 0.0568(11) Uani 1 1 d . . . 
H23A H 0.8359 0.2719 0.3252 0.085 Uiso 1 1 calc R . . 
H23B H 0.8875 0.2881 0.4623 0.085 Uiso 1 1 calc R . . 
H23C H 0.9689 0.3146 0.3581 0.085 Uiso 1 1 calc R . . 
C20 C 0.3060(8) 0.41298(13) 0.0461(4) 0.0499(10) Uani 1 1 d . . . 
H20 H 0.1513 0.4058 0.0036 0.060 Uiso 1 1 calc R . . 
C18 C 0.6778(8) 0.44987(13) 0.0541(4) 0.0565(12) Uani 1 1 d . . . 
H18 H 0.7743 0.4676 0.0177 0.068 Uiso 1 1 calc R . . 
C6 C 0.6311(8) 0.33497(13) 0.8853(4) 0.0524(11) Uani 1 1 d . . . 
H6 H 0.4892 0.3506 0.8759 0.063 Uiso 1 1 calc R . . 
C5 C 0.7704(10) 0.32799(15) 1.0013(4) 0.0684(14) Uani 1 1 d . . . 
H5 H 0.7198 0.3386 1.0706 0.082 Uiso 1 1 calc R . . 
 
loop_ 
 _atom_site_aniso_label 
 _atom_site_aniso_U_11 
 _atom_site_aniso_U_22 
 _atom_site_aniso_U_33 
 _atom_site_aniso_U_23 
 _atom_site_aniso_U_13 
 _atom_site_aniso_U_12 
S1 0.0339(5) 0.0387(5) 0.0366(5) 0.0051(4) 0.0023(4) -0.0048(4) 
O2 0.0263(14) 0.0668(18) 0.068(2) 0.0193(15) 0.0079(13) 0.0025(13) 
O1 0.073(2) 0.0385(14) 0.0416(16) -0.0028(12) 0.0066(14) -0.0205(14) 
O3 0.0358(16) 0.082(2) 0.0507(18) 0.0152(15) -0.0046(13) -0.0197(15) 
O4 0.071(2) 0.0444(16) 0.0509(18) -0.0036(13) -0.0129(15) -0.0101(15) 
C13 0.0275(18) 0.0353(18) 0.0282(19) 0.0031(15) -0.0011(14) -0.0016(15) 
C1 0.035(2) 0.0318(18) 0.034(2) 0.0023(15) 0.0069(16) -0.0028(16) 
C16 0.035(2) 0.0299(17) 0.0302(19) 0.0026(14) 0.0062(15) 0.0024(15) 
C15 0.035(2) 0.0372(19) 0.033(2) 0.0003(16) 0.0055(16) -0.0001(17) 
C14 0.0271(18) 0.0337(18) 0.0288(19) 0.0058(15) -0.0025(14) -0.0010(15) 
C7 0.0303(19) 0.0321(18) 0.0313(19) 0.0037(15) 0.0057(15) 0.0004(15) 
C21 0.034(2) 0.041(2) 0.045(2) 0.0048(17) 0.0039(17) 0.0017(17) 
C2 0.043(2) 0.053(2) 0.047(3) 0.008(2) 0.0120(19) 0.010(2) 
C22 0.050(2) 0.0316(19) 0.040(2) 0.0020(16) 0.0050(19) -0.0046(18) 
C12 0.034(2) 0.044(2) 0.044(2) -0.0033(18) -0.0032(17) -0.0033(17) 
C8 0.034(2) 0.046(2) 0.045(2) -0.0075(18) -0.0005(17) -0.0008(18) 
C19 0.057(3) 0.066(3) 0.046(3) 0.021(2) 0.012(2) 0.016(2) 
C17 0.042(2) 0.043(2) 0.050(3) 0.0071(19) 0.0106(19) -0.0009(19) 
C10 0.055(3) 0.041(2) 0.061(3) -0.011(2) 0.010(2) 0.000(2) 
C11 0.042(2) 0.042(2) 0.063(3) 0.002(2) 0.008(2) 0.0085(19) 
C3 0.038(2) 0.058(3) 0.068(3) 0.016(2) -0.001(2) 0.006(2) 
C4 0.065(3) 0.066(3) 0.045(3) 0.001(2) -0.011(2) -0.007(3) 
C9 0.045(3) 0.050(2) 0.059(3) -0.016(2) -0.005(2) -0.007(2) 
C23 0.065(3) 0.051(2) 0.054(3) -0.005(2) 0.011(2) 0.009(2) 
C20 0.049(3) 0.057(2) 0.039(2) 0.0064(19) -0.0024(19) 0.009(2) 
C18 0.060(3) 0.058(3) 0.054(3) 0.021(2) 0.018(2) 0.001(2) 
C6 0.053(3) 0.056(2) 0.049(3) -0.005(2) 0.010(2) 0.013(2) 
C5 0.089(4) 0.073(3) 0.041(3) -0.014(2) 0.007(2) 0.010(3) 
 
_geom_special_details 
; 
 All esds (except the esd in the dihedral angle between two l.s. planes) 
 are estimated using the full covariance matrix.  The cell esds are taken 
 into account individually in the estimation of esds in distances, angles 
 and torsion angles; correlations between esds in cell parameters are only 
 used when they are defined by crystal symmetry.  An approximate (isotropic) 
 treatment of cell esds is used for estimating esds involving l.s. planes. 
; 
 
loop_ 
 _geom_bond_atom_site_label_1 
 _geom_bond_atom_site_label_2 
 _geom_bond_distance 
 _geom_bond_site_symmetry_2 
 _geom_bond_publ_flag 
S1 O2 1.432(3) . ? 
S1 O1 1.440(3) . ? 
S1 C1 1.755(4) . ? 
S1 C13 1.817(3) . ? 
O3 C15 1.205(4) . ? 
O4 C22 1.206(4) . ? 
C13 C7 1.523(4) . ? 
C13 C14 1.550(4) . ? 
C1 C6 1.382(5) . ? 
C1 C2 1.385(5) . ? 
C16 C21 1.391(5) . ? 
C16 C17 1.394(5) . ? 
C16 C15 1.483(5) . ? 
C15 C14 1.550(5) . ? 
C14 C22 1.558(5) . ? 
C7 C12 1.378(5) . ? 
C7 C8 1.382(5) . ? 
C21 C20 1.374(5) . ? 
C2 C3 1.374(5) . ? 
C22 C23 1.485(5) . ? 
C12 C11 1.390(5) . ? 
C8 C9 1.387(5) . ? 
C19 C18 1.373(6) . ? 
C19 C20 1.387(6) . ? 
C17 C18 1.379(5) . ? 
C10 C11 1.368(5) . ? 
C10 C9 1.368(6) . ? 
C3 C4 1.384(6) . ? 
C4 C5 1.368(6) . ? 
C6 C5 1.377(6) . ? 
 
loop_ 
 _geom_angle_atom_site_label_1 
 _geom_angle_atom_site_label_2 
 _geom_angle_atom_site_label_3 
 _geom_angle 
 _geom_angle_site_symmetry_1 
 _geom_angle_site_symmetry_3 
 _geom_angle_publ_flag 
O2 S1 O1 118.68(17) . . ? 
O2 S1 C1 108.65(17) . . ? 
O1 S1 C1 107.65(16) . . ? 
O2 S1 C13 108.86(16) . . ? 
O1 S1 C13 107.61(16) . . ? 
C1 S1 C13 104.49(16) . . ? 
C7 C13 C14 113.3(3) . . ? 
C7 C13 S1 111.1(2) . . ? 
C14 C13 S1 109.0(2) . . ? 
C6 C1 C2 120.4(4) . . ? 
C6 C1 S1 119.9(3) . . ? 
C2 C1 S1 119.6(3) . . ? 
C21 C16 C17 118.4(3) . . ? 
C21 C16 C15 124.3(3) . . ? 
C17 C16 C15 117.2(3) . . ? 
O3 C15 C16 121.0(3) . . ? 
O3 C15 C14 119.2(3) . . ? 
C16 C15 C14 119.5(3) . . ? 
C15 C14 C13 108.7(3) . . ? 
C15 C14 C22 105.4(3) . . ? 
C13 C14 C22 116.0(3) . . ? 
C12 C7 C8 118.3(3) . . ? 
C12 C7 C13 122.1(3) . . ? 
C8 C7 C13 119.6(3) . . ? 
C20 C21 C16 120.6(4) . . ? 
C3 C2 C1 119.5(4) . . ? 
O4 C22 C23 122.9(4) . . ? 
O4 C22 C14 117.8(3) . . ? 
C23 C22 C14 119.1(3) . . ? 
C7 C12 C11 121.3(3) . . ? 
C7 C8 C9 120.3(4) . . ? 
C18 C19 C20 119.6(4) . . ? 
C18 C17 C16 120.9(4) . . ? 
C11 C10 C9 119.8(4) . . ? 
C10 C11 C12 119.7(4) . . ? 
C2 C3 C4 120.4(4) . . ? 
C5 C4 C3 119.5(4) . . ? 
C10 C9 C8 120.7(4) . . ? 
C21 C20 C19 120.4(4) . . ? 
C19 C18 C17 120.2(4) . . ? 
C5 C6 C1 119.1(4) . . ? 
C4 C5 C6 121.1(4) . . ? 
 
_diffrn_measured_fraction_theta_max    0.998 
_diffrn_reflns_theta_full              25.00 
_diffrn_measured_fraction_theta_full   0.998 
_refine_diff_density_max    0.263 
_refine_diff_density_min   -0.389 
_refine_diff_density_rms    0.059 
